# Supplementary material for: Tuberculous Lymphadenitis in Ethiopia Predominantly Caused by Strains Belonging to the Delhi/CAS Lineage and Newly Identified Ethiopian Clades of the Mycobacterium tuberculosis Complex
Source: PubMed Central journal article supplement (PMC4573740; doi:10.1371/journal.pone.0137865), 2015-09-16
Supplement: pone.0137865.s001.pdf [file pone.0137865.s001.pdf]

MIRU-VNTR lineage cluster no. MLVA 15-9 code

- Ethiopia H37Rv like
- not defined
- Ugandal
- Ethiopia\_2
- S-type
- X-type
- Haarlem
- Ethiopia\_3
- TUR
- URAL
- Delhi/CAS
- Beijing
- LAM
- EAI
- Ethiopia\_1

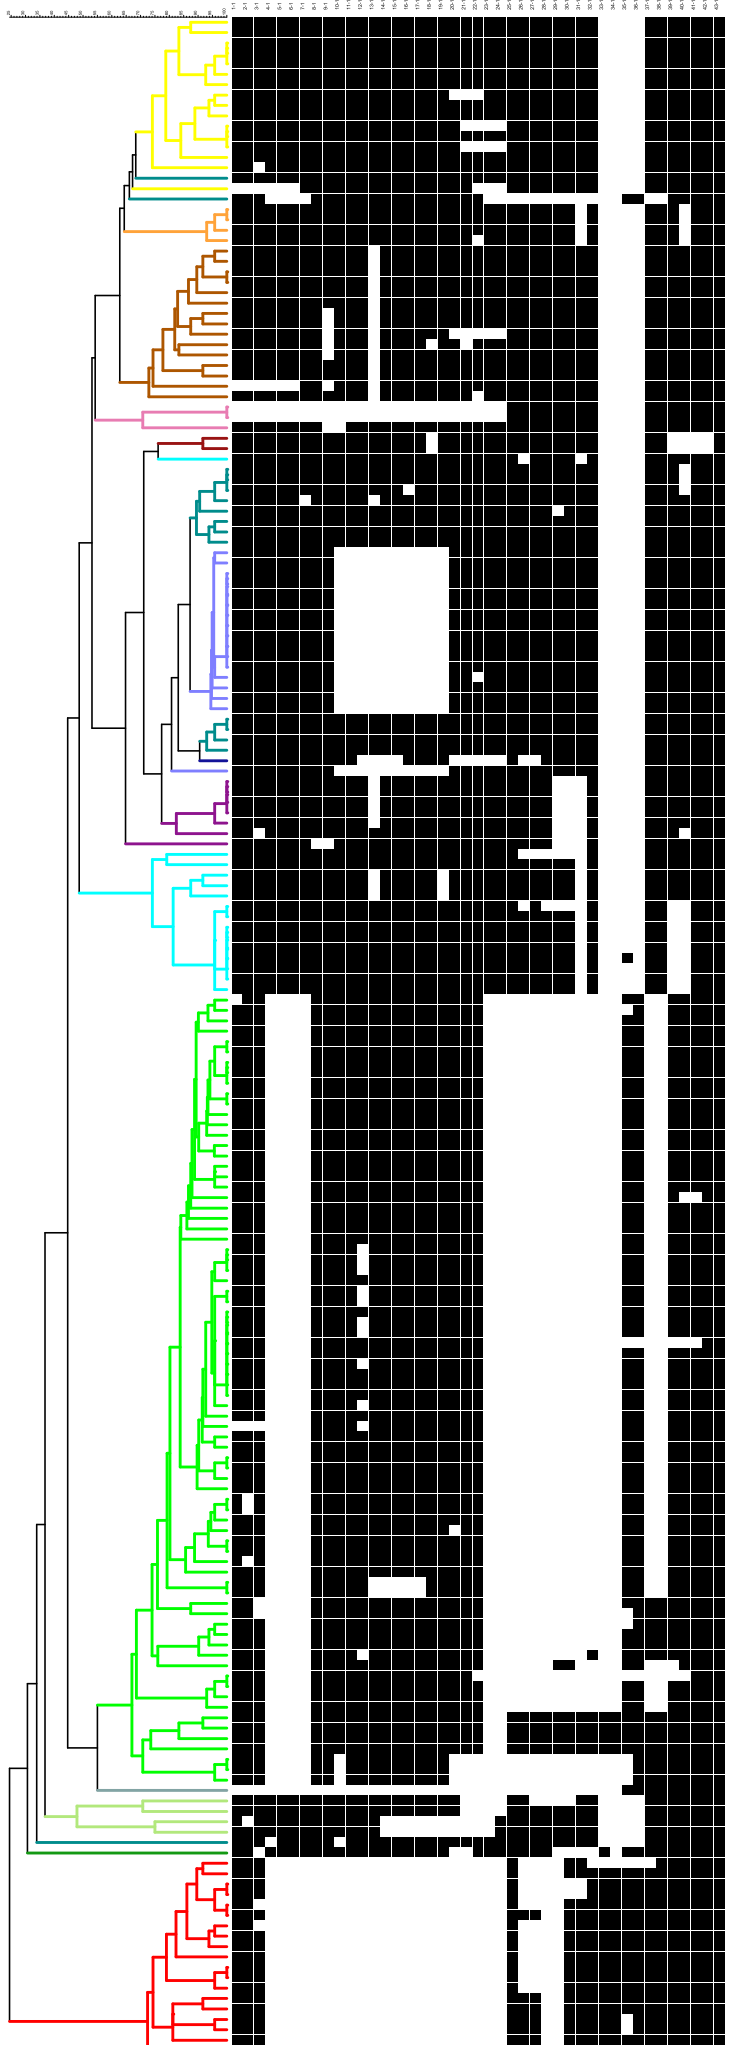

Table of lineage identifiers and their corresponding MLVA 15-9 codes. The entries include lineage names and their associated codes, ordered from top to bottom as they appear in the heatmap.
