# Supplementary material for: Tuberculous Lymphadenitis in Ethiopia Predominantly Caused by Strains Belonging to the Delhi/CAS Lineage and Newly Identified Ethiopian Clades of the Mycobacterium tuberculosis Complex
Source: PubMed Central journal article supplement (PMC4573740; doi:10.1371/journal.pone.0137865), 2015-09-16
Supplement: pone.0137865.s002.pdf [file pone.0137865.s002.pdf]

NJ-Tree, MIRU-VNTR [24]: Categorical

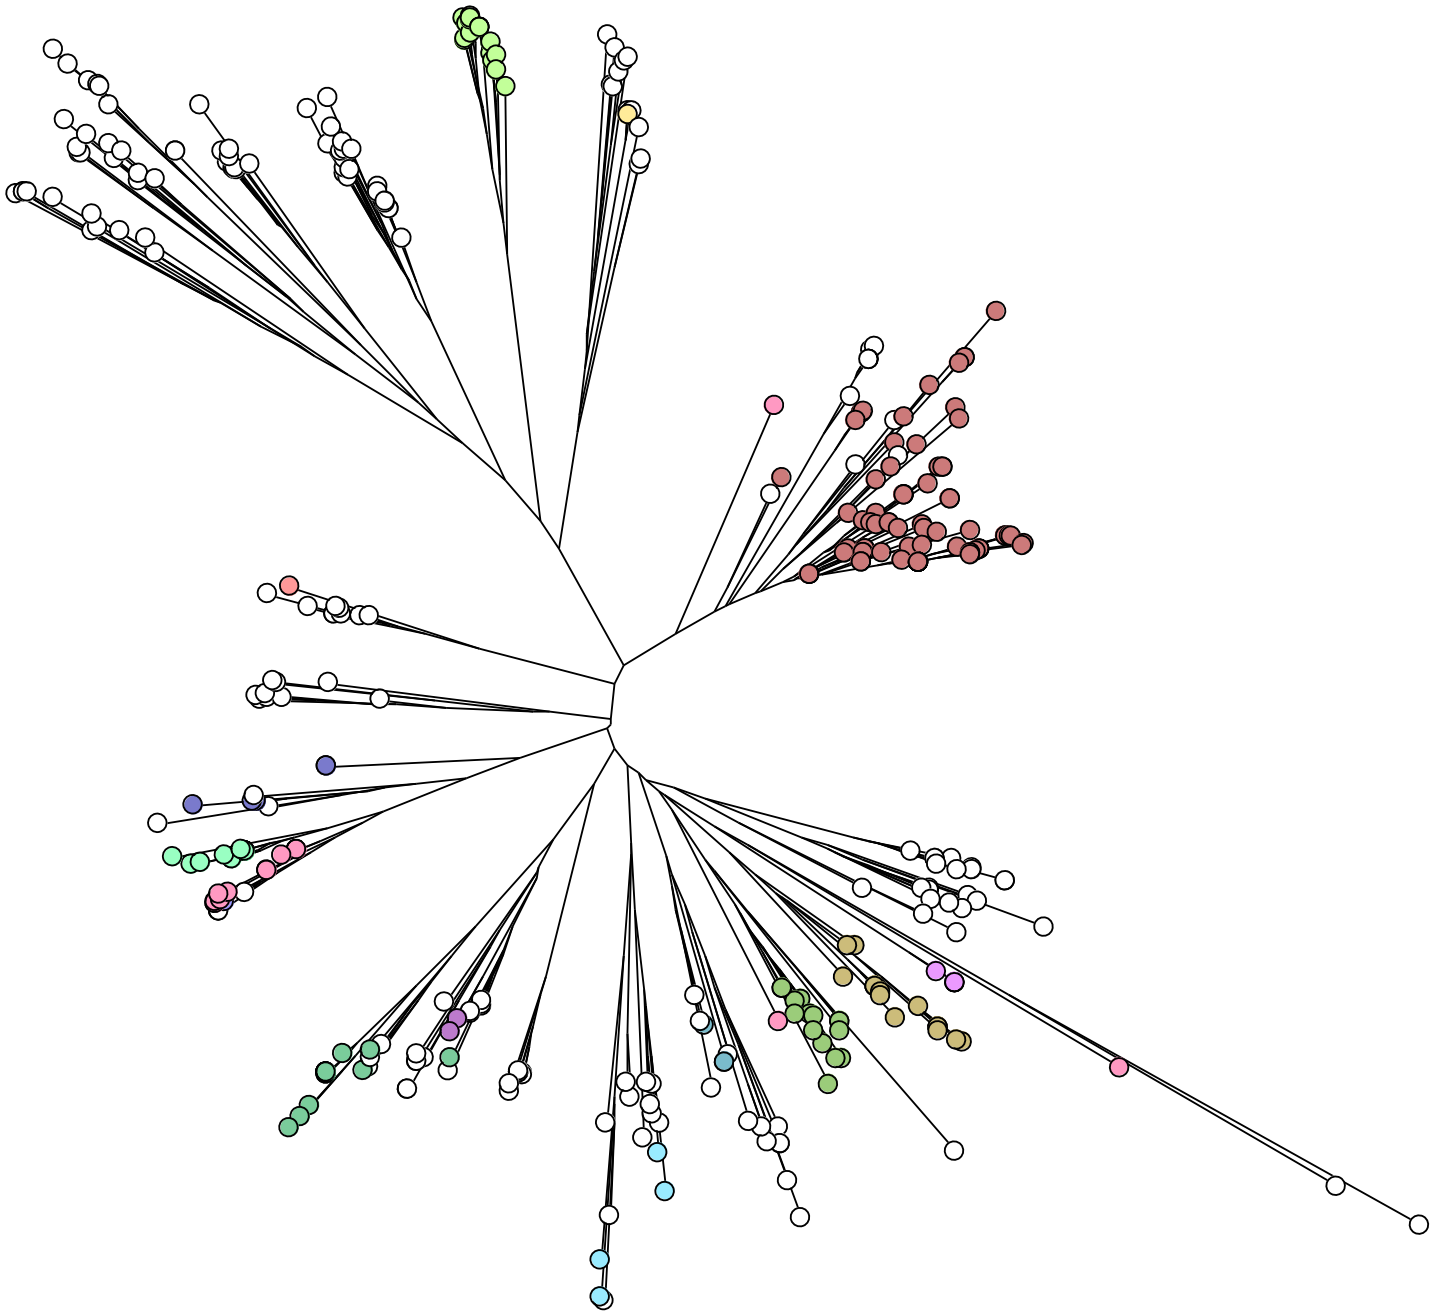

0.1

| Lineage    |           |             |                     |            |            |
|------------|-----------|-------------|---------------------|------------|------------|
| Beijing    | Delhi/CAS | EAI         | Ethiopia H37Rv like | Ethiopia_1 | Ethiopia_2 |
| Ethiopia_3 | Haarlem   | LAM         | S-type              | TUR        | URAL       |
| UgandaI    | X-type    | not defined |                     |            |            |
